# Supplementary material for: Krill Oil Inhibits NLRP3 Inflammasome Activation in the Prevention of the Pathological Injuries of Diabetic Cardiomyopathy
Source: MDPI journal article supplement (doi:10.3390/nu14020368), 2022-01-15
Supplement: s1 [file s1]

## Supplementary Material

**Table S1. Ingredients composition of experimental diets.**

| Ingredient (g/kg)                     | Normal diet | High-fat diet | Krill oil |
|---------------------------------------|-------------|---------------|-----------|
| Soybean oil                           | 70          | 70            | 55        |
| krill oil                             | -           | -             | 15        |
| Lard                                  | -           | 230           | 230       |
| $\beta$ -Cornstarch                   | 397.49      | 110.62        | 110.62    |
| $\alpha$ -(dextrinized)<br>Cornstarch | 132         | 36.87         | 36.87     |
| Casein                                | 200         | 250           | 250       |
| Sucrose                               | 100         | 200           | 200       |
| AIN-93 mineral mixture                | 35          | 35            | 35        |
| AIN-93 vitamin mixture                | 10          | 10            | 10        |
| L-Cystine                             | 3           | 3.75          | 3.75      |
| Choline bitartrate                    | 2.5         | 2.5           | 2.5       |
| Cellulose                             | 50          | 50            | 50        |
| tert-Butylhydroquinone                | 0.01        | 0.06          | 0.06      |
| Cholesterol                           | -           | 1.2           | 1.2       |
| Protein                               | 203         | 253.75        | 253.75    |
| Carbohydrates                         | 629.49      | 347.49        | 347.49    |
| Fat                                   | 70          | 300           | 300       |

**Table S2. Composition analysis of krill oil used in the study**

| Krill oil              | Result | Unit                |
|------------------------|--------|---------------------|
| Astaxanthin            | 232.15 | mg/kg               |
| Peroxide               | < 0.2  | eEq/kg              |
| Saponification         | 163.0  | mg/KOH/g            |
| Total phospholipids    | 55.06  | g/100g              |
| Fatty acid composition |        | %/total fatty acids |
| C14:0                  | 10.51  |                     |
| C16:0                  | 25.77  |                     |
| C16:1                  | 6.15   |                     |
| C18:0                  | 0.28   |                     |
| C18:1                  | 14.2   |                     |
| C18:2                  | 1.33   |                     |
| C18:3                  | 1.59   |                     |
| C20:3                  | 1.19   |                     |
| C20:4                  | 0.73   |                     |
| C20:5 (EPA)            | 22.89  |                     |
| C22:6 (DHA)            | 13.83  |                     |

**Table S3. Sequences of primers used for qRT-PCR.**

| gene name                         | Sequences of primers       | GenBank accession number | Product size |
|-----------------------------------|----------------------------|--------------------------|--------------|
| <i>Acta2</i> -F                   | TAACCCTTCAGCGTTCAGC        | NM_007392.3              | 99           |
| <i>Acta2</i> -R                   | ACATAGCTGGAGCAGCGTCT       | NM_007392.3              | 99           |
| <i>Ccl2</i> -F                    | CTTCTGGGCCTGCTGTTCA        | NM_011333.3              | 127          |
| <i>Ccl2</i> -R                    | CCAGCCTACTCATTGGGATCA      | NM_011333.3              | 127          |
| <i>Colla1</i> -F                  | CCGCTGGTCAAGATGGTC         | NM_007742.4              | 117          |
| <i>Colla1</i> -R                  | CTCCAGCCTTTCCAGGTTCT       | NM_007742.4              | 117          |
| <i>Gsdmd</i> -F                   | TGTCAACCTGTCAATCAAGGA      | NM_026960.4              | 68           |
| <i>Gsdmd</i> -R                   | AGCCAAAACACTCCGGTTC        | NM_026960.4              | 68           |
| <i>Icam1</i> -F                   | GCTACCATCACCGTGATTTCG      | NM_010493.3              | 80           |
| <i>Icam1</i> -R                   | AGGTCCTTGCCTACTTGCTG       | NM_010493.3              | 80           |
| <i>Ifn-<math>\gamma</math></i> -F | AGCGGCTGACTGAACTCAGATTGTAG | NM_008337.4              | 247          |
| <i>Ifn-<math>\gamma</math></i> -R | GTCACAGTTTTTCAGCTGTATAGGG  | NM_008337.4              | 247          |
| <i>Il-1<math>\beta</math></i> -F  | GACCTTCCAGGATGAGGACA       | NM_008361.4              | 183          |
| <i>Il-1<math>\beta</math></i> -R  | AGCTCATATGGGTCCGACAG       | NM_008361.4              | 183          |
| <i>Nox4</i> -F                    | TTGCCTGGAAGAACCCAAGT       | NM_001285835.1           | 84           |
| <i>Nox4</i> -R                    | TCCGCACAATAAAGGCACAA       | NM_001285835.1           | 84           |
| <i>Rplp0</i> -F                   | AGCAAAGGAAGAGTCGGAGG       | NM_007475.5              | 83           |
| <i>Rplp0</i> -R                   | GGCTGACTTGCTTGCTTTGG       | NM_007475.5              | 83           |
| <i>Sele</i> -F                    | TCAGTGGCTGCCGAAGTATT       | NM_011345.2              | 69           |
| <i>Sele</i> -R                    | TGGATCTCATGCTGGCTTCA       | NM_011345.2              | 69           |

|                                   |                          |                |     |
|-----------------------------------|--------------------------|----------------|-----|
| <i>Sirt3</i> -F                   | TCGTCCTGCAGAGCATCAT      | NM_001127351.1 | 106 |
| <i>Sirt3</i> -R                   | ACAGAGGGATATGGGCCTTC     | NM_001127351.1 | 106 |
| <i>Tnf-<math>\alpha</math></i> -F | TTGTCTTAATAACGCTGATTTGGT | NM_001278601.1 | 61  |
| <i>Tnf-<math>\alpha</math></i> -R | GGGAGCAGAGGTTTCAGTGAT    | NM_001278601.1 | 61  |

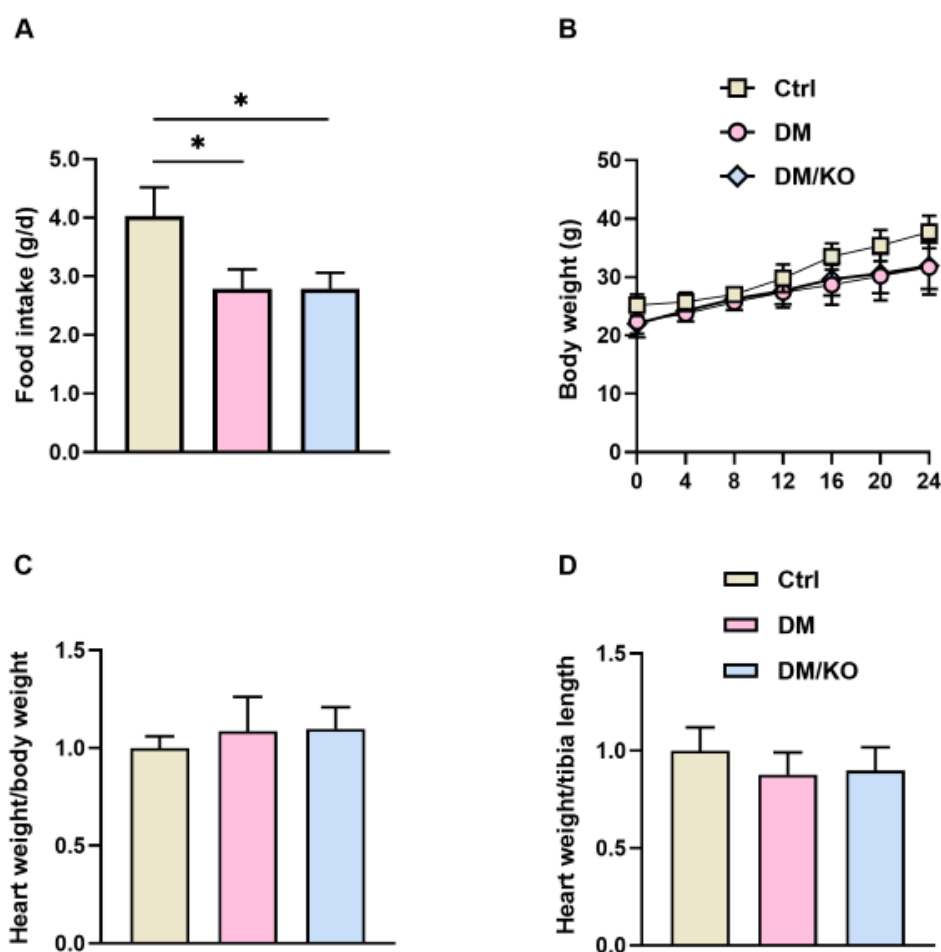

**Figure S1. Basic data for animal models** (A) Average food intake. (B) Body weight.

After harvesting, the hearts were weighed, with ratios of (C) heart to body weight, and (D) heart weight to tibia length calculated. For (C) and (D), the data were normalized to Ctrl, and summarized as means  $\pm$  SD. \*,  $P < 0.05$  vs. Ctrl; Abbreviations: Ctrl, control; DM, diabetes mellitus; KO, krill oil.
